# Supplementary figures and images for: Fabrication of densely packed multi-walled carbon nanotube ultrathin films using a liquid–liquid interface
Source: Royal Society of Chemistry journal article supplement (doi:10.1039/b706695c), 2007-01-01

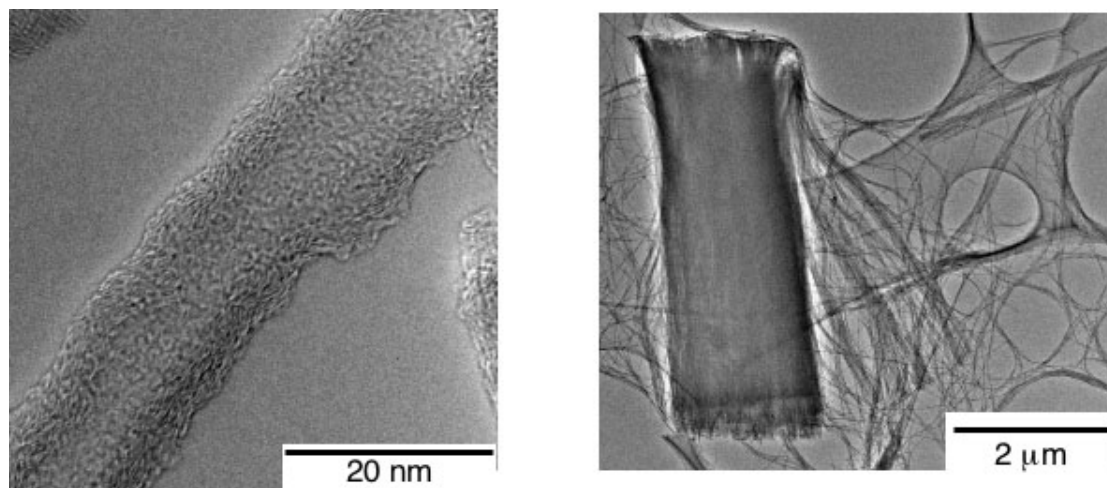

Fig. S1: TEM images of MWCNTs

Supplement: b706695c.pdf [file b706695c.pdf]
